# Supplementary material for: Interactions between deforestation, landscape rejuvenation, and shallow landslides in the North Tanganyika–Kivu rift region, Africa
Source: Copernicus journal article supplement (doi:10.5194/esurf-9-445-2021), 2021-05-31
Supplement: Supplementary file 1 [file esurf-9-445-2021-supplement.pdf]

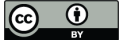

*Supplement of*

## **Interactions between deforestation, landscape rejuvenation, and shallow landslides in the North Tanganyika–Kivu rift region, Africa**

**Arthur Depicker et al.**

*Correspondence to:* Arthur Depicker ([arthur.depicker@kuleuven.be](mailto:arthur.depicker@kuleuven.be))

The copyright of individual parts of the supplement might differ from the article licence.

## S1 Deforestation wave in rejuvenated and relict landscapes

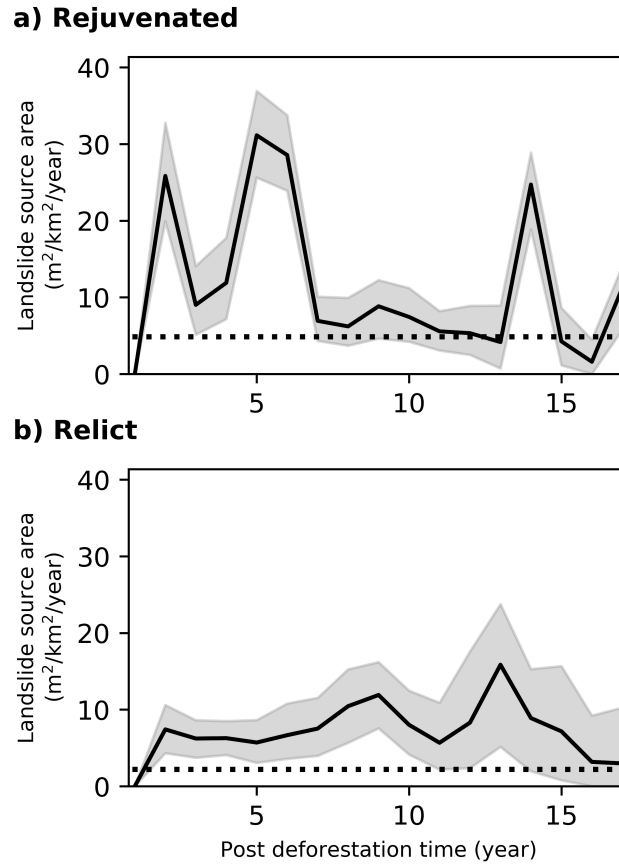

**Figure S1. Deforestation-induced landslide wave in different geomorphic contexts.** Overall landslide source area ( $LS_S$ ,  $\text{m}^2 \text{km}^{-2} \text{year}^{-1}$ ) in function of time elapsed since deforestation. The grey area represents the 90 % confidence interval, derived from 100 iterations of  $LS_S$  calculations (Section 3.2.4). The dotted line shows the overall erosion rates in the different contexts. **a)** Landslide response to deforestation in rejuvenated landscapes, characterized with 193 landslide instances. The irregular curve suggests that, in order to better characterize the deforestation-induced landslide wave, we need more landslide and deforestation observations and over a larger area. **b)** Landslide response to deforestation in relict landscapes, characterized with 181 landslide instances. The dotted line represents the background erosion rate in relict landscapes.
